# Supplementary material for: A fruit extract of Styphnolobium japonicum (L.) counteracts oxidative stress and mediates neuroprotection in Caenorhabditis elegans
Source: PubMed Central journal article supplement (PMC10507854; doi:10.1186/s12906-023-04149-8), 2023-09-19
Supplement: 12906_2023_4149_MOESM2_ESM.pdf [file 12906_2023_4149_MOESM2_ESM.pdf]

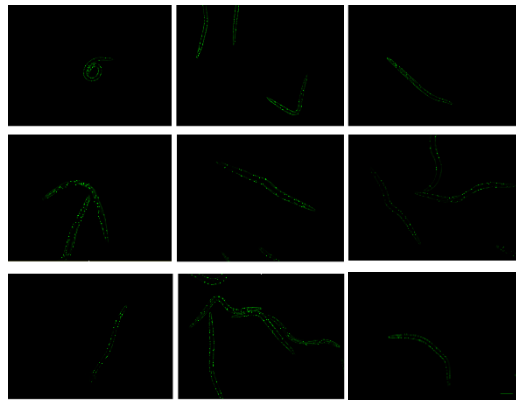

(a) Untreated Control

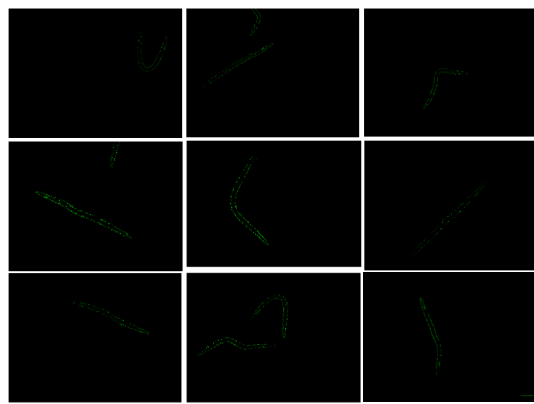

(c) Solvent Control

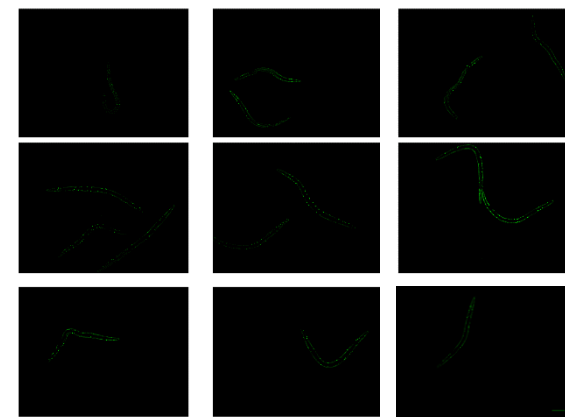

(b) SJ 100 µg/ml

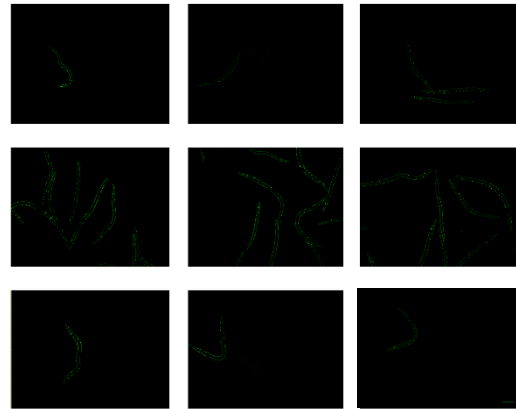

(d) SJ 200 µg/ml

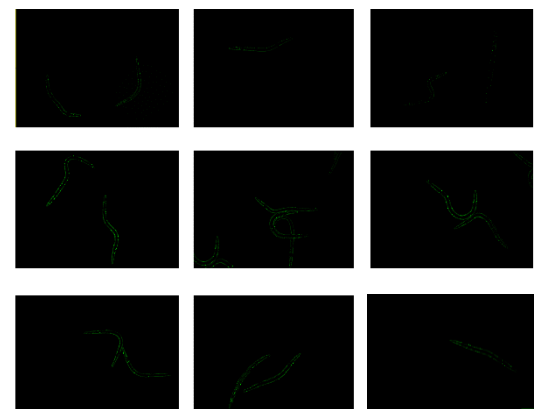

(e) SJ 300 µg/ml

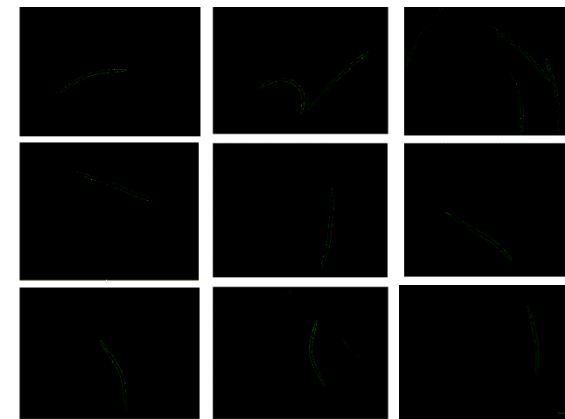

(f) EGCG 50 µg/ml

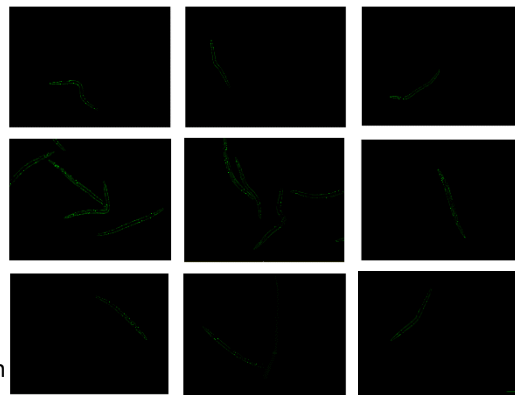

(g) Rutin 100 µg/ml

**Supplementary Figure S2:**

Representative images of worms for polyQ40 expression

scale bar = 100 µm.
